# Supplementary material for: Synthesis of novel pyrazolylbiscoumarin derivatives using FeTUD-1 as a mesoporous solid acid catalyst
Source: Royal Society of Chemistry journal article supplement (doi:10.1039/c3ra43913e), 2013-01-01
Supplement: c3ra43913e.pdf [file c3ra43913e.pdf]

## Electronic Supplementary Information for

# Synthesis of novel pyrazolylbiscoumarin derivatives using FeTUD-1 as Mesoporous solid acid catalyst

Karthikeyan Kandasamy,<sup>a</sup> Muthusamy Poomalai Pachamuthu,<sup>a,b</sup> Manimaran Muthusamy,<sup>a</sup> Sivaprasad Ganesabaskaran,<sup>\*a</sup> and Anand Ramanathan <sup>\*c</sup>

<sup>a</sup>Department of Chemistry, University College of Engineering Tindivanam, (a Constituent College of Anna University Chennai), Melpakkam – 604001, India. Tel: +91-9444656169; E-mail: [sibi.gb@gmail.com](mailto:sibi.gb@gmail.com)

<sup>b</sup>Department of Chemistry, Anna University, Chennai 600025, India

<sup>c</sup>Center for Environmentally Beneficial Catalysis (CEBC), The University of Kansas, Lawrence, KS 66047, USA, Tel.: +1-785-864-1631; Fax: +1-785-864-6051; E-mail: [anand@ku.edu](mailto:anand@ku.edu)

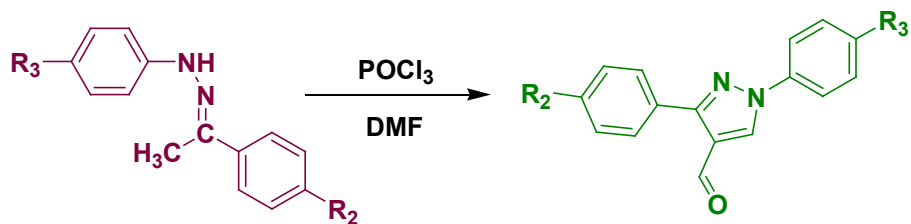

Scheme S1. Synthesis of pyrazole aldehyde from acetophenone phenylhydrazone

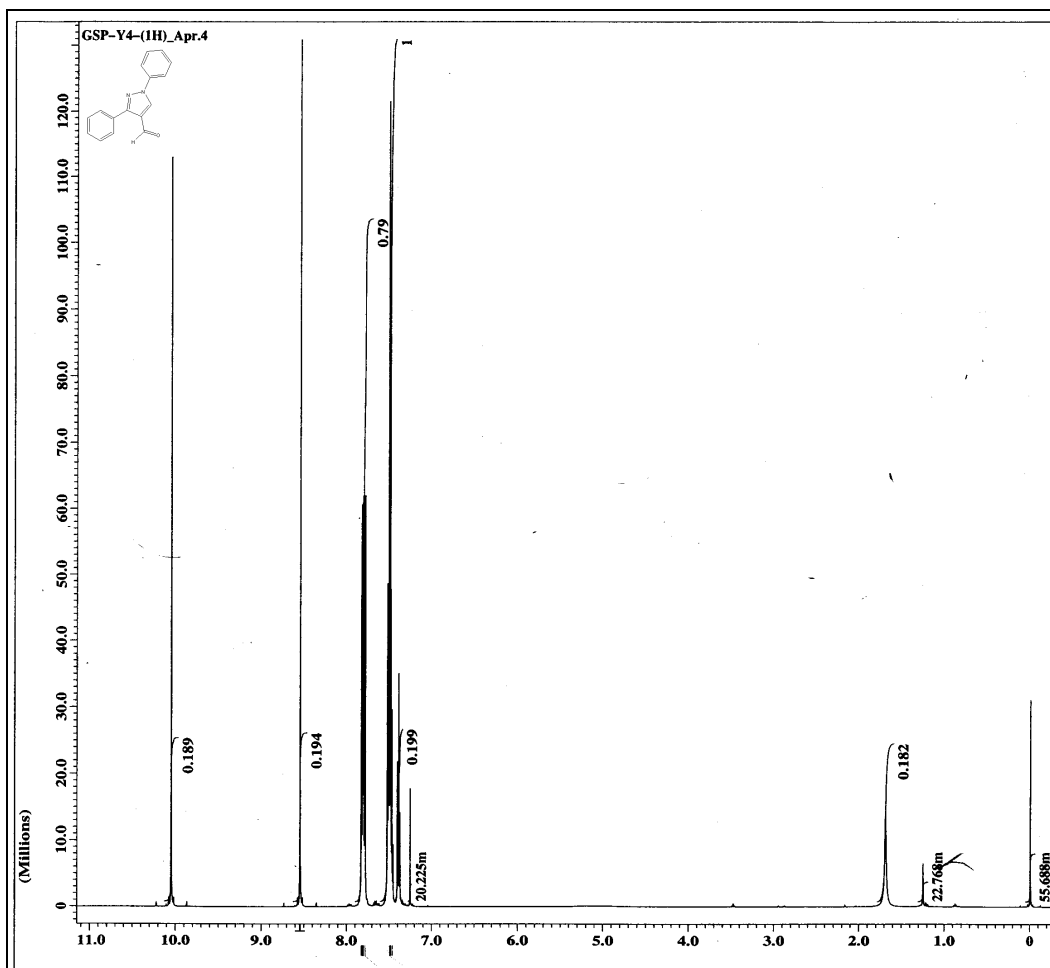

Figure S1.  $^1\text{H}$  NMR spectrum of 1,3-diphenyl-1H-pyrazole-4-carbaldehyde.

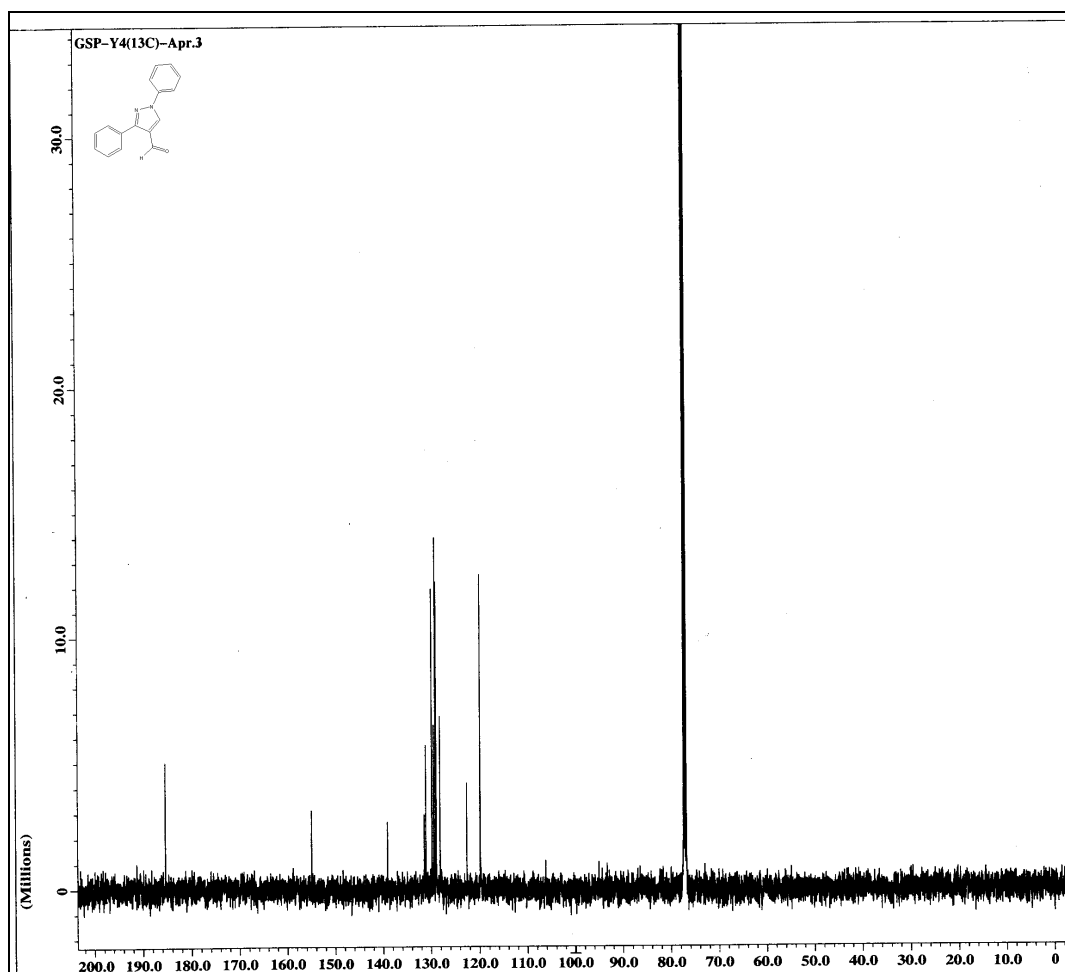

Figure S2.  $^{13}\text{C}$  NMR spectrum of 1,3-diphenyl-1H-pyrazole-4-carbaldehyde.

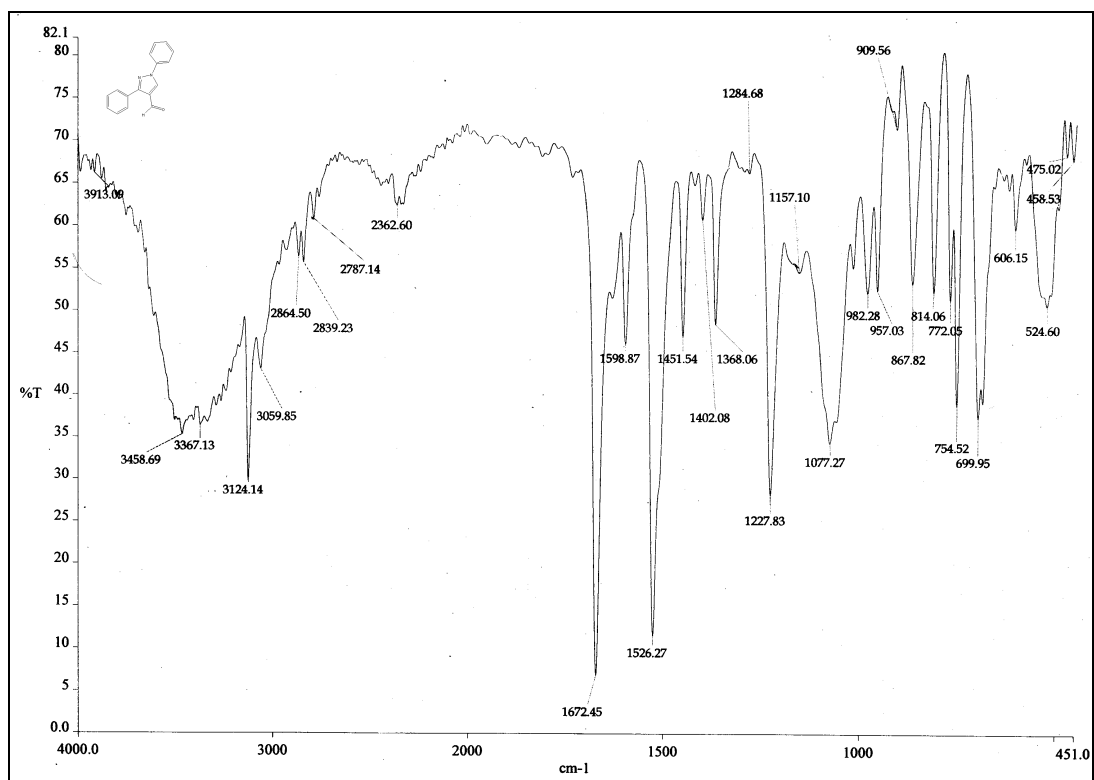

Figure S3. FTIR spectrum of 1,3-diphenyl-1H-pyrazole-4-carbaldehyde.

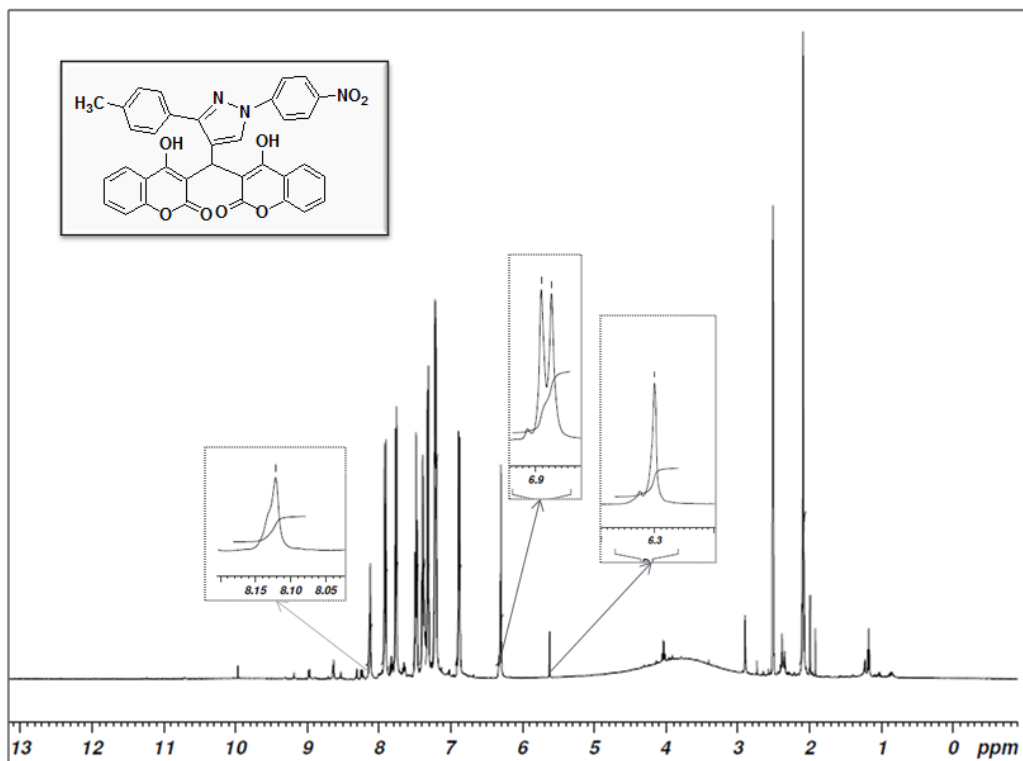

Figure S4. <sup>1</sup>H NMR spectrum of 4-hydroxy-3-((4-hydroxy-2-oxo-2H-chromen-3-yl)(1-(4-nitrophenyl)-3-p-tolyl-1H-pyrazol-4-yl)methyl)-2H-chromen-2-one [Table.1-Product 6].

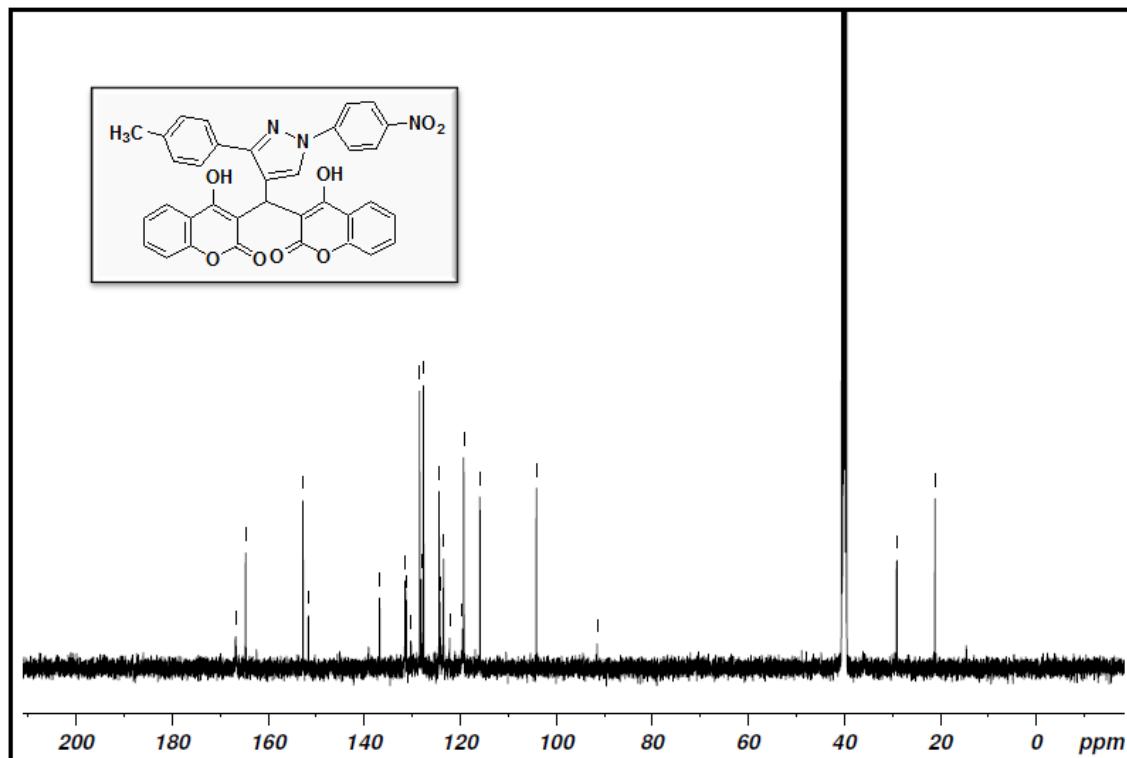

Figure S5. <sup>13</sup>C NMR spectrum of 4-hydroxy-3-((4-hydroxy-2-oxo-2H-chromen-3-yl)(1-(4-nitrophenyl)-3-p-tolyl-1H-pyrazol-4-yl)methyl)-2H-chromen-2-one [Table.1-Product 6].

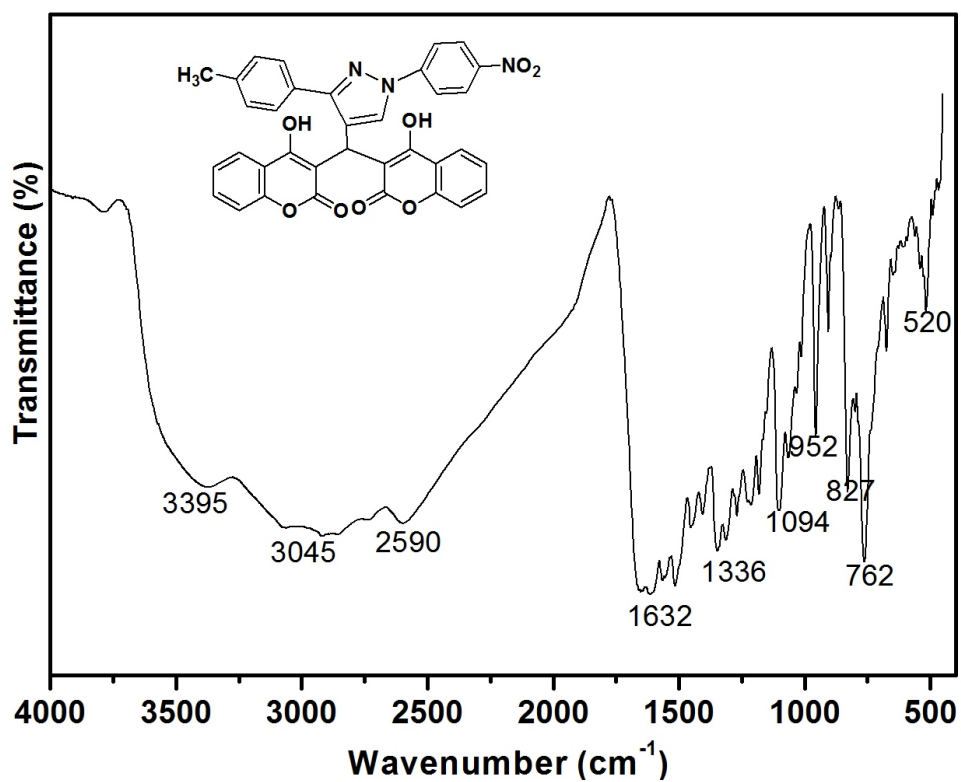

Figure S6. FTIR spectrum of 4-hydroxy-3-((4-hydroxy-2-oxo-2H-chromen-3-yl)(1-(4-nitrophenyl)-3-p-tolyl-1H-pyrazol-4-yl)methyl)-2H-chromen-2-one [Table.1-Product 6]

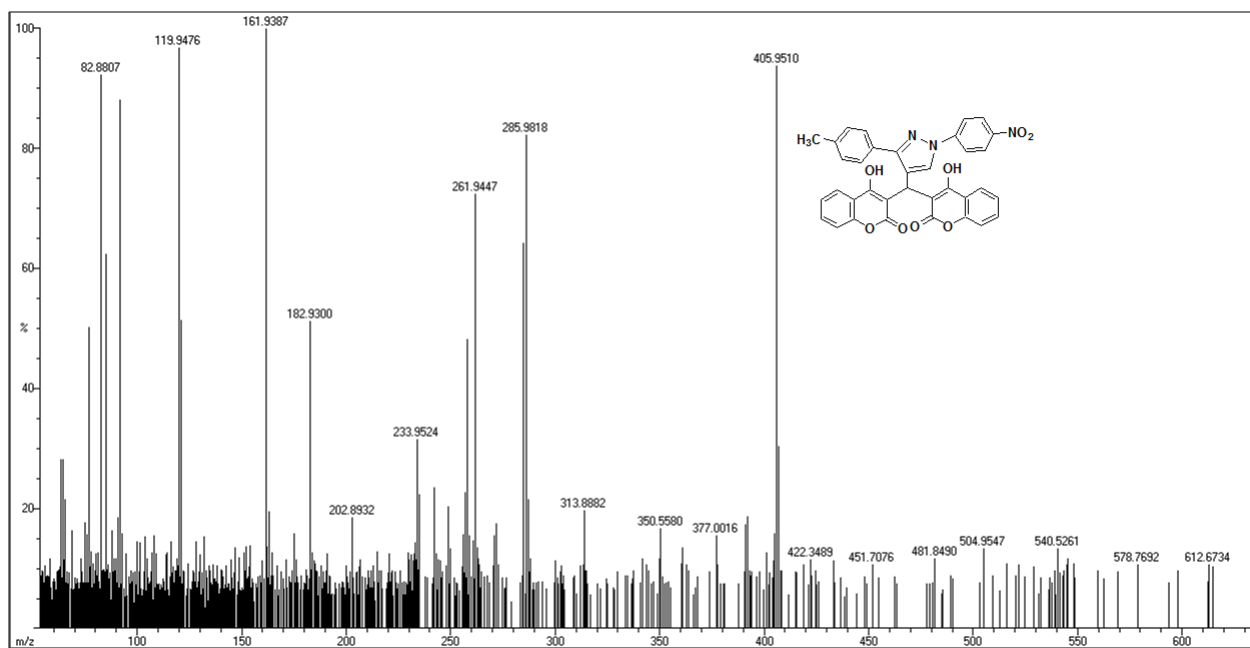

Figure S7. GC-MS data of 4-hydroxy-3-((4-hydroxy-2-oxo-2H-chromen-3-yl)(1-(4-nitrophenyl)-3-p-tolyl-1H-pyrazol-4-yl)methyl)-2H-chromen-2-one [Table.1-Product 6]
